# Supplementary material for: Diffusion- and velocity-driven spatial separation of analytes from single droplets entering an ICP off-axis
Source: Royal Society of Chemistry journal article supplement (doi:10.1039/c3ja50307k), 2013-11-02
Supplement: c3ja50307k.pdf [file c3ja50307k.pdf]

## Diffusion- and velocity-driven spatial separation of analytes from single droplets entering an ICP off-axis

Olga Borovinskaya<sup>a</sup>, Maryam Aghaei<sup>c</sup>, Luca Flamigni<sup>a</sup>, Bodo Hattendorf<sup>d</sup>, Martin Tanner<sup>b</sup>, Annemie Bogaerts<sup>c</sup>, Detlef Günther<sup>a</sup>

### 1. Dependence of temporal shifts and signal widths on the analyte concentration

Droplets of multi-element solutions of different concentrations were measured. The solutions were exchanged without adjusting operating parameters of the dispenser to keep the droplet size and ejection speed constant. After the removal for solution exchange, the dispenser head was inserted into the gas inlet at the same position to maintain the droplet trajectory. Figure 1 shows FWHM and temporal shifts of the  $^{209}\text{Bi}^+$  signal from the signal of  $^{89}\text{Y}^+$  measured at different concentrations. Despite significant increase of signal intensities (from 700 ions/droplet to 8000 ions/droplet for  $^{209}\text{Bi}^+$  at concentrations of 1 mg/kg and 10 mg/kg, respectively) temporal positions of maxima remained constant within the uncertainty of the measurement (1 SD). A slight increase of the signal width with concentration was observed.

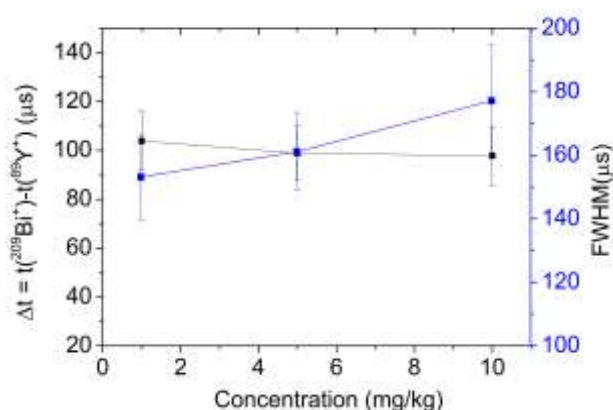

**Figure 1.** Temporal shifts of  $^{209}\text{Bi}^+$  signal from the  $^{89}\text{Y}^+$  signal and signal widths of  $^{209}\text{Bi}^+$  measured at different concentrations of the multi-element solution. The error bars represent 1 SD of 500 measurements of individual droplets.

### 2. Boiling temperatures of oxides

| Chemical formula        | Boiling temperature (K) | Literature source                                                                   |
|-------------------------|-------------------------|-------------------------------------------------------------------------------------|
| $\text{Cu}_2\text{O}$   | 2073 <sup>d</sup>       | <a href="http://www.hbcnetbase.com/">http://www.hbcnetbase.com/</a>                 |
| $\text{ZnO}$            | 2623                    | Arch. Sci. Phys. Nat., 1919, vol. 1, p. 48 - 48                                     |
| $\text{Y}_2\text{O}_3$  | 4573 <sup>s</sup>       | Troshkina, O. B. Spektrosk. At. Mol., 1969, p. 17 - 22                              |
| $\text{CdO}$            | 1832                    | <a href="http://www.hbcnetbase.com/">http://www.hbcnetbase.com/</a>                 |
| $\text{In}_2\text{O}_3$ | 1123                    | Zeitschrift fuer Anorganische und Allgemeine Chemie, 1999, vol. 625, p. 1890 - 1896 |
| $\text{BaO}$            | -                       | -                                                                                   |
| $\text{La}_2\text{O}_3$ | 3893                    | <a href="http://www.hbcnetbase.com/">http://www.hbcnetbase.com/</a>                 |
| $\text{Ce}_2\text{O}_3$ | 4003                    | <a href="http://www.wolframalpha.com/">http://www.wolframalpha.com/</a>             |
| $\text{Ho}_2\text{O}_3$ | 4173                    | <a href="http://www.hbcnetbase.com/">http://www.hbcnetbase.com/</a>                 |

|                                |      |                                                                     |
|--------------------------------|------|---------------------------------------------------------------------|
| Er <sub>2</sub> O <sub>3</sub> | 4193 | <a href="http://www.hbcnetbase.com/">http://www.hbcnetbase.com/</a> |
| HfO <sub>2</sub>               | 5673 | Gmelin Handbook: Hf: SVol., 6, page 20 - 22                         |
| PbO                            | 1743 | Z. Erzbergbau Metallhuettenwes., 1957, vol. 10, p. 64 - 71          |
| Bi <sub>2</sub> O <sub>3</sub> | 2163 | <a href="http://www.hbcnetbase.com/">http://www.hbcnetbase.com/</a> |
| ThO <sub>2</sub>               | 4673 | <a href="http://www.hbcnetbase.com/">http://www.hbcnetbase.com/</a> |

---

<sup>d</sup> Decomposition temperature, <sup>s</sup> sublimation temperature
